# Supplementary material
Source: publisher site journal article supplement (https://www.spandidos-publications.com/4071/downloadSupplementary)

Figure S1. Identification of exosomes isolated from the blood of patients with sepsis and healthy patients. (A) Transmission electron micrograph of exosomes (scale bar, 200 nm; magnification, x50,000). (B) Western blotting analysis of exosome markers CD9, CD63 and CD81. (C) PKH-67 was used to monitor the uptake of exosomes by AC16 cells (magnification, x400). exo, exosome.

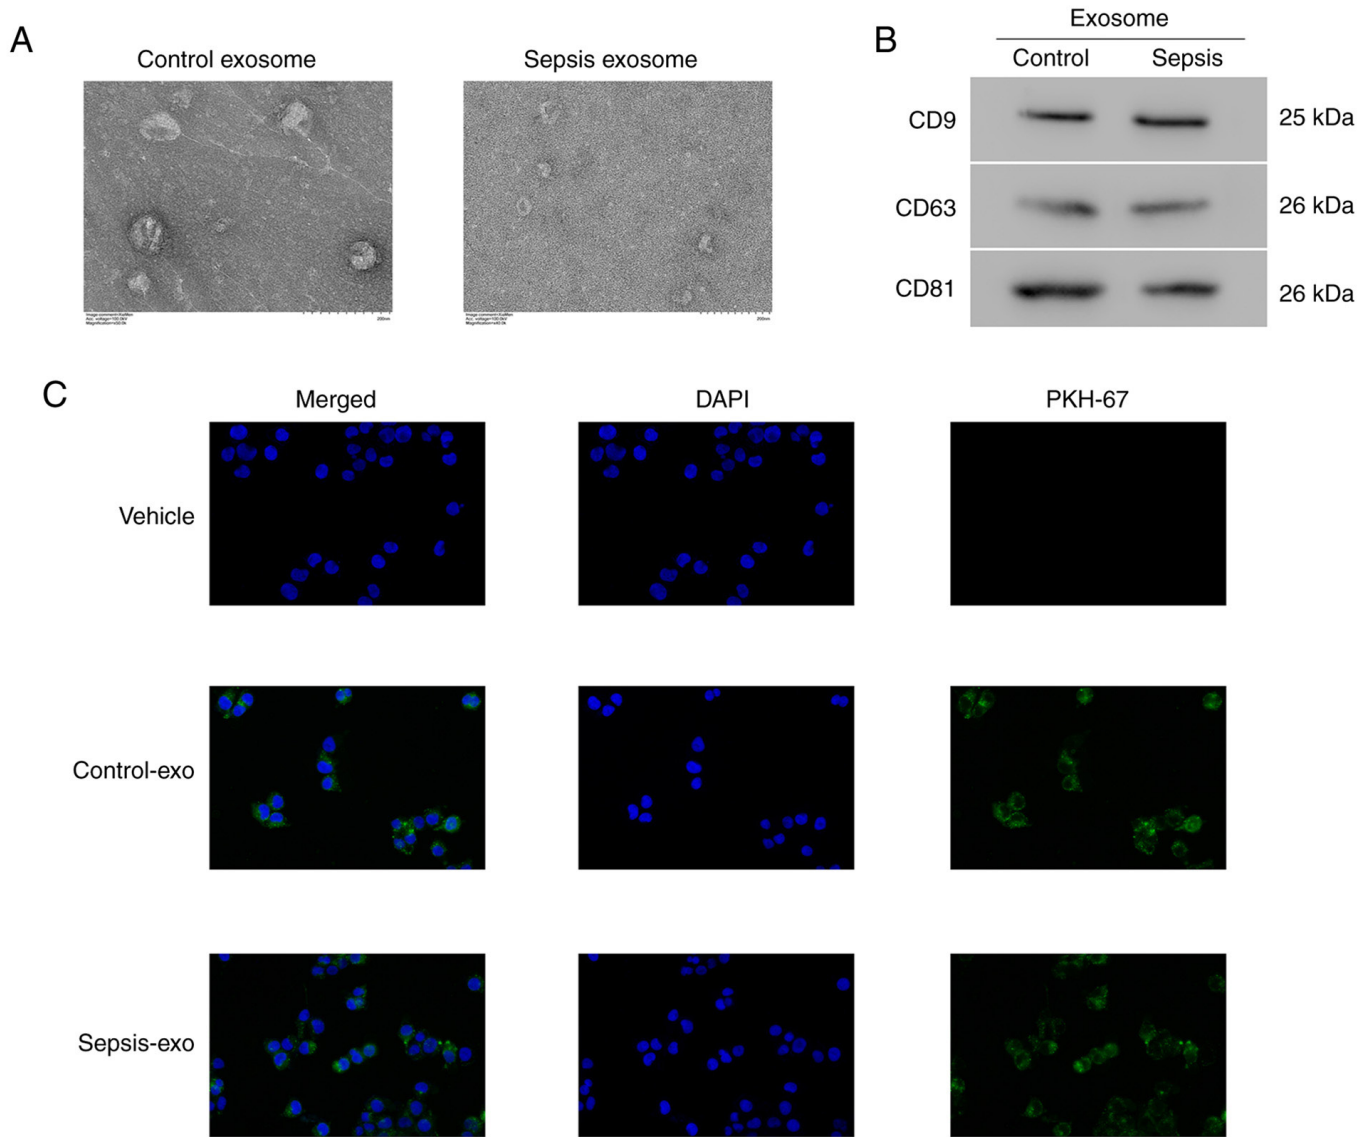

Figure S2. Silencing and overexpressing SLC2A1 in AC16 cells. Relative (A) mRNA and (B) protein expression levels of SLC2A1 were decreased by SLC2A1 siRNAs (siSLC2A1-1, siSLC2A1-2 and siSLC2A1-3). Relative (C) mRNA and (D) protein expression levels of SLC2A1 were increased by oeSLC2A1 transfection. (E) Schematic representation of the results of the present study. \*\*\* $P < 0.001$  vs. siNC or oeNC. SLC2A, solute carrier family 2 member; si, small interfering RNA; NC, negative control; oe, overexpression; hsa, human serum albumin; miR, microRNA; exo, exosome.

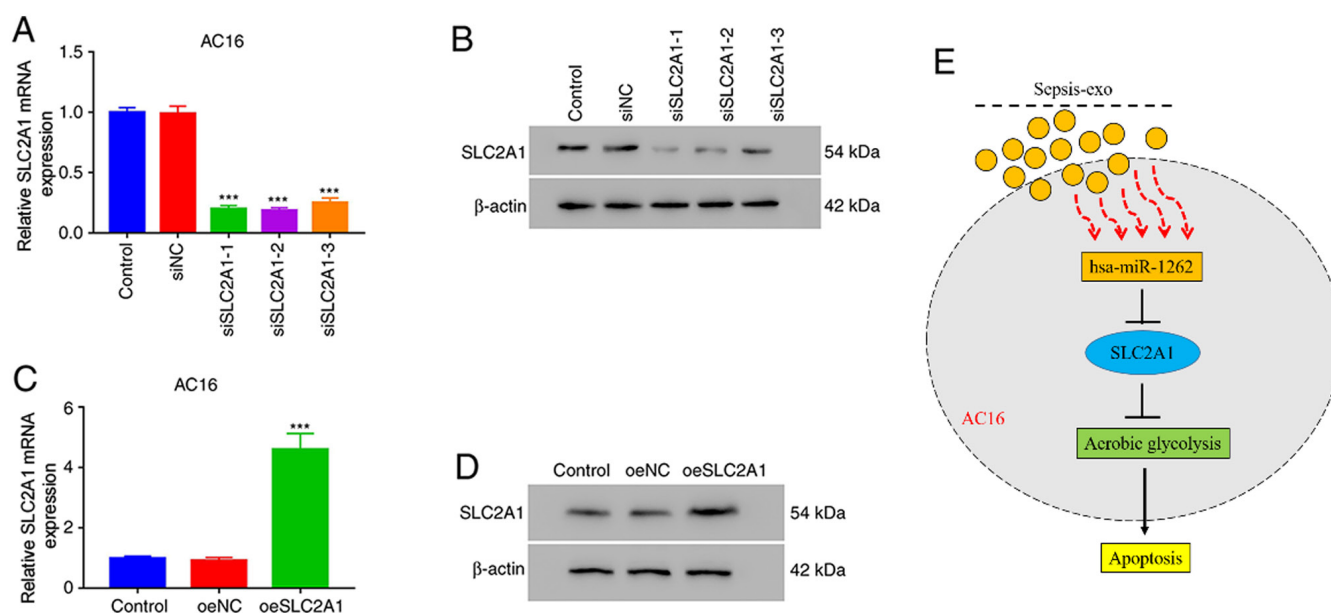

Supplement: Supplementary file 1 [file downloadSupplementary]
